# Supplementary material for: Tracking the reaction networks of acetaldehyde oxide and glyoxal oxide Criegee intermediates in the ozone-assisted oxidation reaction of crotonaldehyde
Source: Royal Society of Chemistry journal article supplement (doi:10.1039/d4cp01942c), 2024-01-01
Supplement: d4cp01942c1.pdf [file d4cp01942c1.pdf]

## SUPPLEMENTARY INFORMATION

### **Tracking the reaction networks of acetaldehyde oxide and glyoxal oxide Criegee intermediates in the ozone-assisted oxidation reaction of crotonaldehyde**

Alec C. DeCecco,<sup>1</sup> Alan R. Conrad,<sup>1</sup> Arden M. Floyd,<sup>1</sup> Ahren W. Jasper,<sup>2</sup> Nils Hansen,<sup>3</sup>  
Philippe Dagaut,<sup>4</sup> Nath-Eddy Moody,<sup>1</sup> and Denisia M. Popolan-Vaida<sup>1,\*</sup>

<sup>1</sup>*Department of Chemistry, University of Central Florida, Orlando, FL 32816, USA*

<sup>2</sup>*Chemical Sciences and Engineering Division, Argonne National Laboratory, Lemont, IL 60439,  
USA*

<sup>3</sup>*Combustion Research Facility, Sandia National Laboratories, Livermore, CA 94551, USA*

<sup>4</sup>*Centre National de la Recherche Scientifique (CNRS), ICARE, 1C Avenue de la Recherche  
Scientifique, 45071 Orléans Cedex 2, France*

---

\*Author to whom correspondence should be addressed. E-mail: [denisia.popolan-vaida@ucf.edu](mailto:denisia.popolan-vaida@ucf.edu),  
Tel: (+1) 407-823-1537.

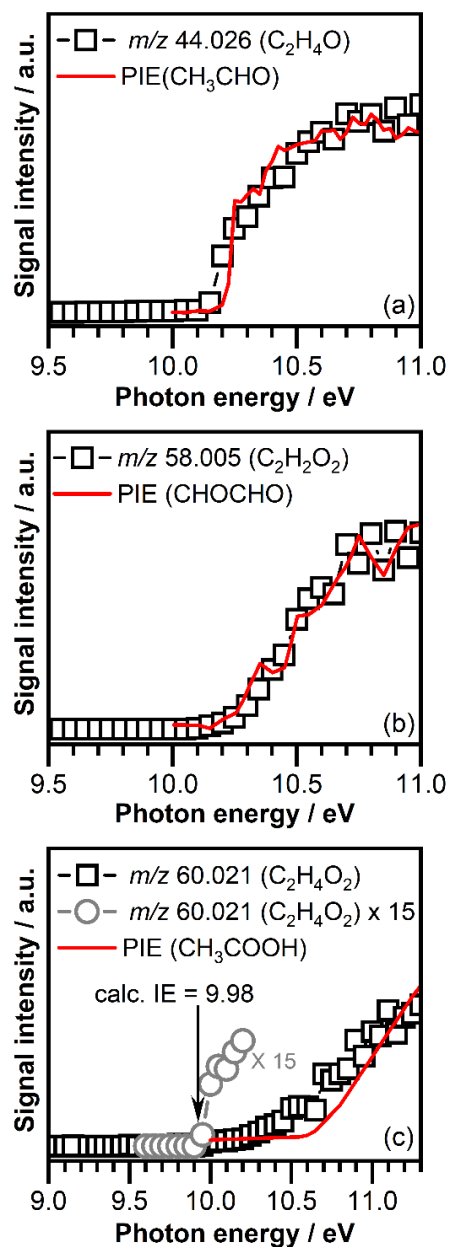

**Figure S1:** Photoionization identification of the oxidation products recorded at (a)  $m/z$  44.026 ( $C_2H_4O$ ), (b)  $m/z$  58.005 ( $C_2H_2O_2$ ), and (c)  $m/z$  60.021 ( $C_2H_4O_2$ ) in the JSR experiment at a temperature of 390 K (open symbols). Solid read lines correspond to the measured photoionization spectra of (a) acetaldehyde,<sup>1</sup> (b) glyoxal,<sup>2</sup> and (c) acetic acid.<sup>3</sup> Indicated by an arrow in panel (c) is the calculated adiabatic ionization energy of glycolaldehyde.<sup>4</sup>

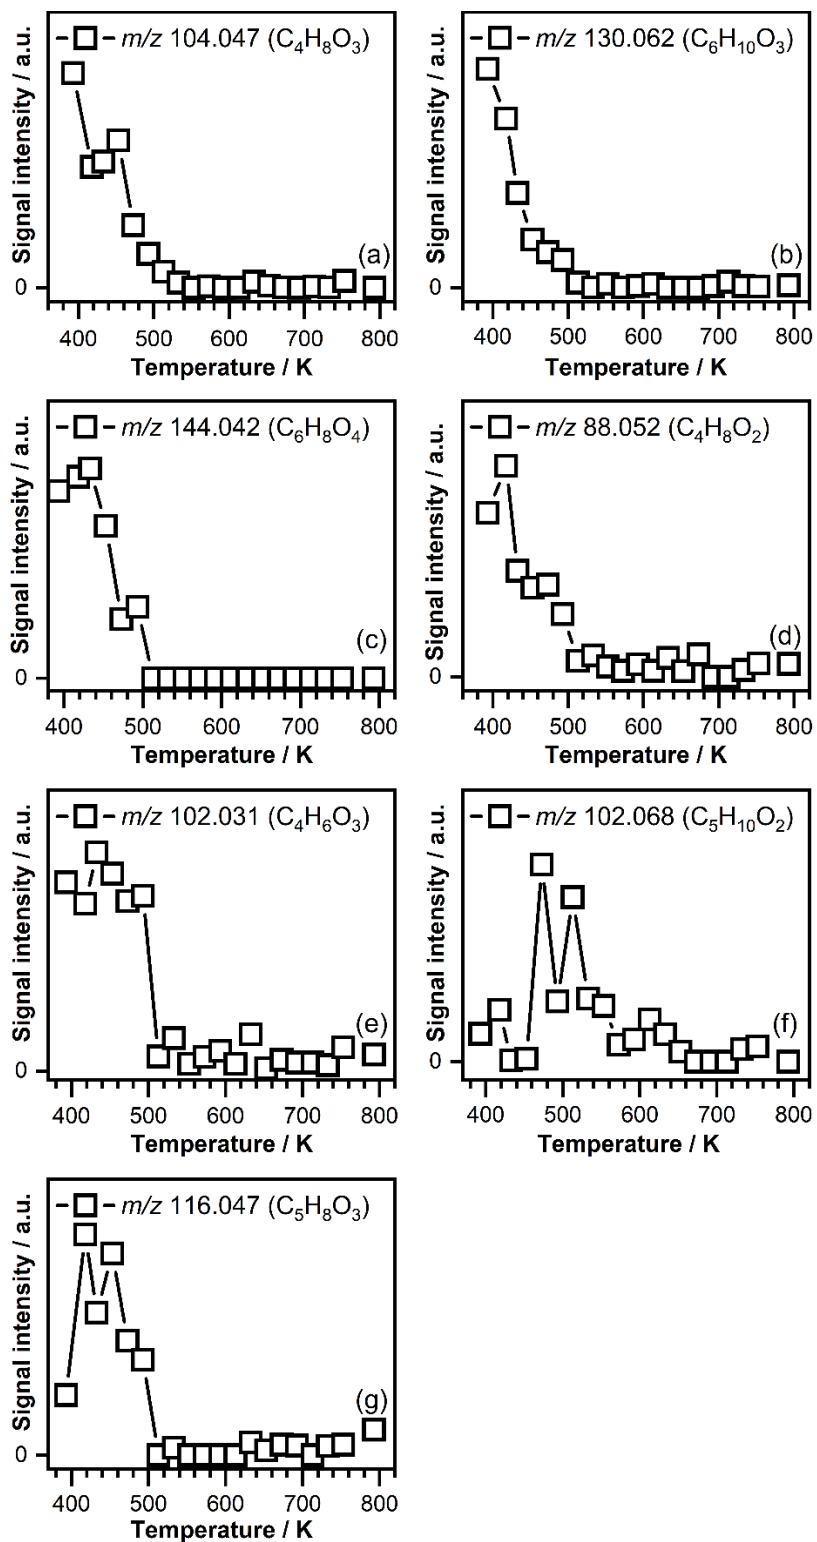

**Figure S2:** Temperature profiles recorded at a photon energy of 10.50 eV at (a)  $m/z$  104.047, (b)  $m/z$  130.062 (c)  $m/z$  144.042, (d)  $m/z$  88.052, (e)  $m/z$  102.031, (f)  $m/z$  102.068, and (g)  $m/z$  116.047 corresponding to bimolecular reaction products of CI-1 and CI-2.

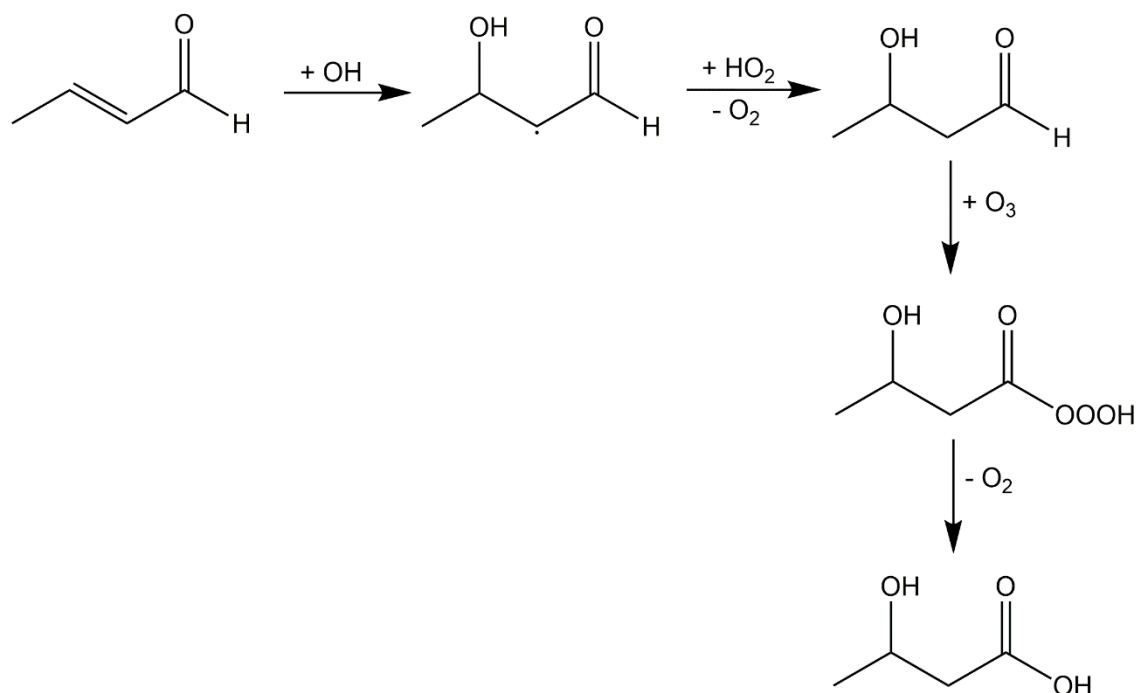

**Figure S3:** The formation channel of the 3-hydroxybutanoic acid. The 1,3-dipolar insertion of ozone into the C-H bond of 3-hydroxybutanal to form 3-hydroxy-1-trioxidaneylbutan-1-one, and its subsequent decomposition involving intramolecular H transfer to form 3-hydroxybutanoic acid and molecular oxygen has been adopted from literature.<sup>5,6</sup>

#### References:

1. T. A. Cool, K. Nakajima, T. A. Mostefaoui, F. Qi, A. McIlroy, P. R. Westmoreland, M. E. Law, L. Poisson, D. S. Peterka and M. Ahmed, *J. Chem. Phys.*, 2003, **119**, 8356-8365.
2. M. F. Vansco, R. L. Caravan, K. Zuraski, F. A. F. Winiberg, K. Au, N. Trongsirawat, P. J. Walsh, D. L. Osborn, C. J. Percival, M. A. H. Khan, D. E. Shallcross, C. A. Taatjes and M. I. Lester, *J. Phys. Chem. A*, 2020, **124**, 3542-3554.
3. S. Leach, M. Schwell, H.-W. Jochims and H. Baumgärtel, *Chem. Phys.*, 2006, **321**, 171-182.
4. A. C. Rousso, N. Hansen, A. W. Jasper and Y. Ju, *J. Phys. Chem. A*, 2018, **122**, 8674-8685.
5. A. C. Voukides, K. M. Konrad and R. P. Johnson, *J. Org. Chem.*, 2009, **74**, 2108-2113.
6. J. Cerkovnik, B. Plesničar, J. Koller and T. Tuttle, *J. Org. Chem.*, 2009, **74**, 96-101.
